# Supplementary material
Source: publisher site journal article supplement (http://e-cmh.org/upload/media/cmh-2023-0076-Supplementary-Table-2.pdf)
Supplement: Supplementary file 1 [file cmh-2023-0076-Supplementary-Table-2.pdf]

**Supplementary Table 2.** Subsequent treatment strategies after disease progression

| Treatment         | TARE (n=87) | TKI (n=24) |
|-------------------|-------------|------------|
| TACE              | 38 (43.7)   | 6 (25.0)   |
| TARE              | 4 (4.6)     | 0 (0)      |
| Radiation therapy | 7 (8.1)     | 1 (4.2)    |
| Resection         | 8 (9.2)     | 0 (0)      |
| RFA               | 2 (2.3)     | 0 (0)      |
| Systemic therapy  | 23 (26.4)   | 9 (37.5)   |
| HAIC              | 0 (0)       | 3 (12.5)   |
| Others            | 5 (5.7)     | 5 (20.8)   |

The data are expressed as number (%).

HAIC, hepatic artery infusion chemotherapy; RFA, radiofrequency ablation; TACE, transarterial chemoembolization; TARE, transarterial radioembolization; TKI, tyrosine kinase inhibitor.
